# Supplementary figures and images for: Phylogeographic Description of <em>Histoplasma capsulatum</em>, United States
Source: Preprints.org preprint supplement (doi:10.20944/preprints202308.0338.v1), 2023-08-04

**Figure S1**: Neighbor-joining tree showing SNP differences.


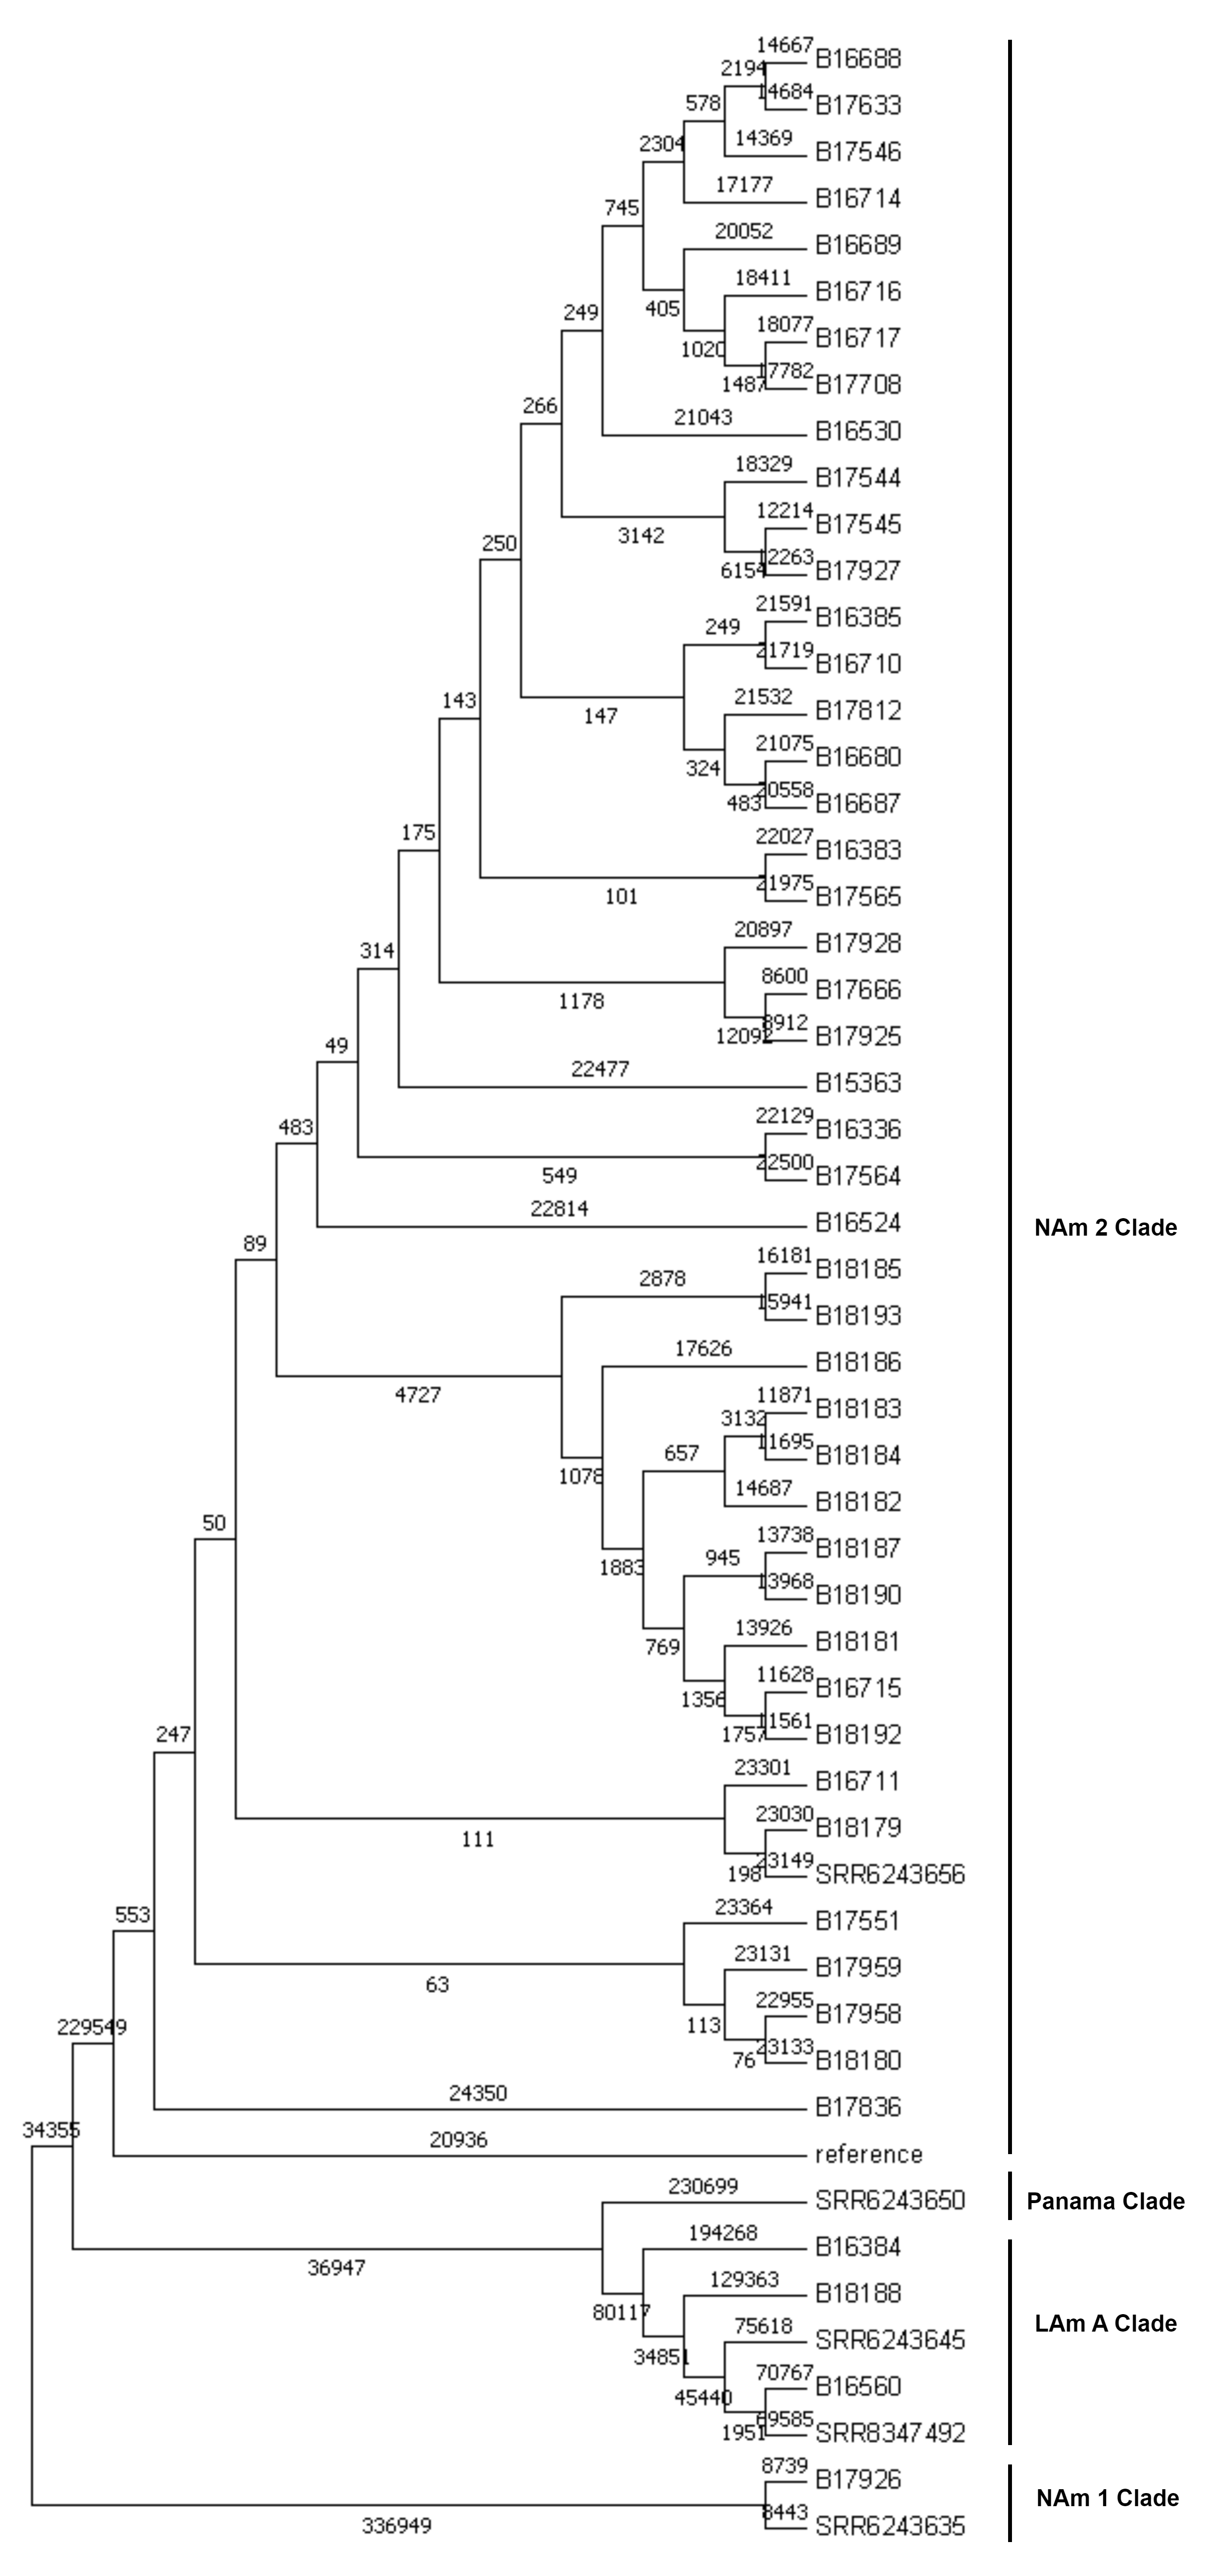

Supplement: Supplementary file 3 [file supplementary]
